# Supplementary material for: Benzene degradation in a denitrifying biofilm reactor: activity and microbial community composition
Source: PubMed Central journal article supplement (PMC5486827; doi:10.1007/s00253-017-8214-8), 2017-03-20
Supplement: 253_2017_8214_MOESM1_ESM.pdf [file 253_2017_8214_MOESM1_ESM.pdf]

## **Applied Microbiology and Biotechnology**

### **Benzene degradation in a denitrifying biofilm reactor: activity and microbial community composition**

Marcelle J. van der Waals<sup>#1,2</sup>, Siavash Atashgahi<sup>2</sup>, Ulisses Nunes da Rocha<sup>3</sup>, Bas M. van der Zaan<sup>1</sup>, Hauke Smidt<sup>2</sup> and Jan Gerritse<sup>1</sup>

<sup>1</sup> Deltares, Subsurface and Groundwater Systems, Princetonlaan 6, 3584 CB Utrecht, the Netherlands

<sup>2</sup> Wageningen University & Research, Laboratory of Microbiology, Stippeneng 4, 6708 WE Wageningen, the Netherlands

<sup>3</sup> VU University of Amsterdam, Department of Molecular Cell Physiology, De Boelelaan 1085, 1081 HV Amsterdam, the Netherlands

# Corresponding author

Phone +31 646914584, Fax +31 88 3357856, E-mail: [Marcelle.vanderwaals@deltares.nl](mailto:Marcelle.vanderwaals@deltares.nl)

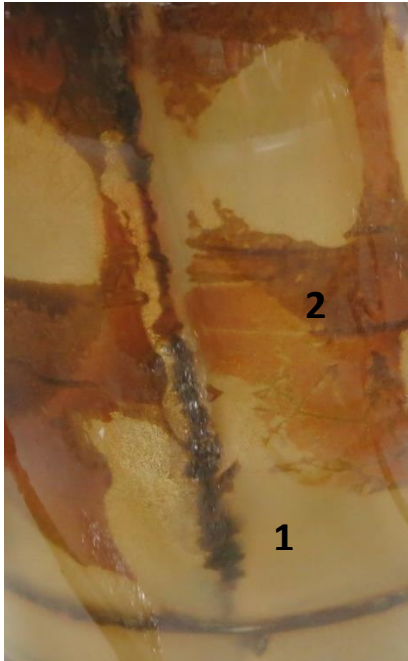

**Figure S1** White (1) and brown (2) biofilm attached at the glass wall and metal surfaces in the continuous culture

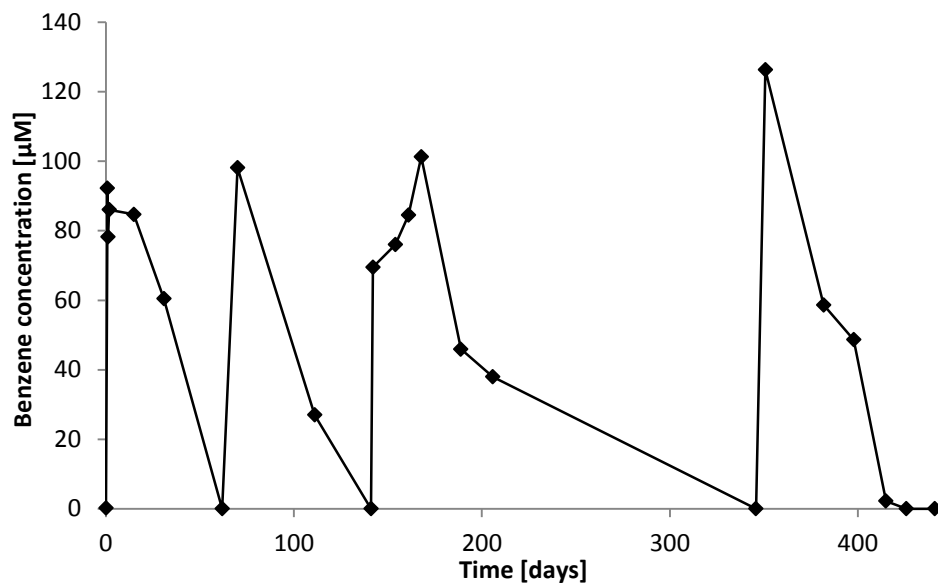

**Figure S2** Time course analysis of benzene concentration in the microcosm with transferred liquid from the continuous culture supplied with 100  $\mu\text{M}$  benzene and 3.6 mM nitrate. After each benzene depletion, benzene was replenished

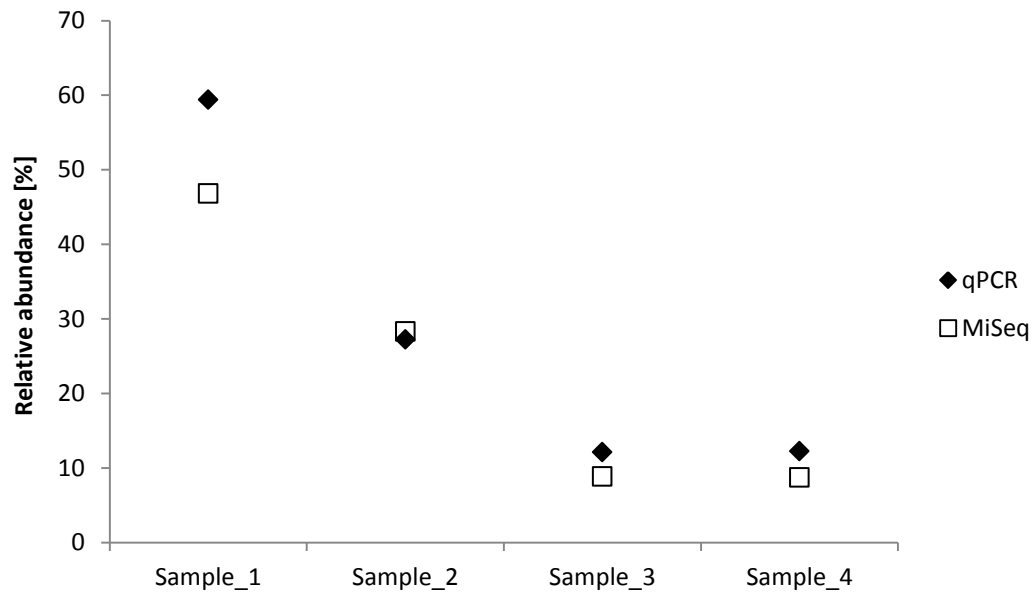

**Figure S3** Relative abundance of *Peptococcaceae* versus total bacterial 16S rRNA gene copies in the different samples, calculated using qPCR (closed diamonds) and MiSeq (open squares)
